# Supplementary material for: Patients with Heart Failure and Preserved Ejection Fraction Are at Risk of Gastrointestinal Bleeding
Source: PubMed Central journal article supplement (PMC6724012; doi:10.3390/jcm8081240), 2019-08-17
Supplement: jcm-08-01240-s001.pdf [file jcm-08-01240-s001.pdf]

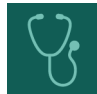

Supplementary Tables

**Table S1.** Additional baseline characteristics of registered patients.

| Variable n (%)                                                        | All patients (n = 328) | No OAC (n = 116)   | OAC (n = 212)       | p value          |
|-----------------------------------------------------------------------|------------------------|--------------------|---------------------|------------------|
| <b>Laboratory parameters</b>                                          |                        |                    |                     |                  |
| Platelet count, G/L (IQR)                                             | 224 (187–266)          | 226 (196–263)      | 222 (181–267)       | 0.471            |
| Albumin, g/L (IQR)                                                    | 41.2 (38.7–43.2)       | 41.3 (37.95–42.90) | 41.20 (38.90–43.30) | 0.319            |
| <b>Cholinesterase, kU/L (IQR)</b>                                     | 6.40 (5.13–8.02)       | 7.79 (5.83–9.15)   | 6.21 (5.00–7.44)    | <b>0.030</b>     |
| ALAT, U/L (IQR)                                                       | 21 (16–28)             | 21 (15–25)         | 22 (16–30)          | 0.111            |
| ASAT, U/L (IQR)                                                       | 25 (20–31)             | 23 (20–28)         | 25 (21–33)          | <b>0.001</b>     |
| Gamma–GT, U/L (IQR)                                                   | 34 (22–66)             | 26 (17–43)         | 41 (27–77)          | <b>&lt;0.001</b> |
| Serum Creatinine, mg/dL (IQR)                                         | 1.06 (0.87–1.31)       | 0.98 (0.82–1.15)   | 1.13 (0.91–1.34)    | <b>0.003</b>     |
| <b>Echocardiographic parameters</b>                                   |                        |                    |                     |                  |
| E/e', ratio (IQR)                                                     | 15 (11–20)             | 14.5 (10.4–20.4)   | 15 (11–20)          | 0.802            |
| Left atrial diameter, mm (IQR)                                        | 61 (57–66)             | 58 (54–62)         | 64 (60–68)          | <b>&lt;0.001</b> |
| Right atrial diameter, mm (IQR)                                       | 62 (56–68)             | 57 (52–62)         | 64 (58–70)          | <b>&lt;0.001</b> |
| RV–performance moderately to severely reduced n (%)                   | 40 (13.6)              | 5 (4.1)            | 35 (17.0)           | <b>0.001</b>     |
| Systolic pulmonary arterial pressure, mmHg (IQR)                      | 56 (44–70)             | 48 (38–62)         | 59 (48–74)          | <b>&lt;0.001</b> |
| Significant tricuspid regurgitation <sup>‡</sup> , n (%)              | 175 (54.5)             | 43 (35.2)          | 132 (64.1)          | <b>&lt;0.001</b> |
| <b>Cardiac magnetic resonance imaging parameters</b>                  |                        |                    |                     |                  |
| Left atrial area index, mm/m <sup>2</sup> (IQR)                       | 30 (25–36)             | 27 (23–33)         | 32 (27–37)          | <b>&lt;0.001</b> |
| Right atrial area index, mm/m <sup>2</sup> (IQR)                      | 27 (23–34)             | 24 (21–28)         | 30 (25–36)          | <b>&lt;0.001</b> |
| Left ventricular ejection fraction, % (IQR)                           | 27 (23–34)             | 67 (60–74)         | 61 (53–71)          | <b>0.009</b>     |
| Left ventricular end-diastolic volume index, mL/m <sup>2</sup> (IQR)  | 63 (55–72)             | 118 (102–136)      | 120 (101–147)       | 0.617            |
| Left ventricular mass index, g/m <sup>2</sup> (IQR)                   | 103 (102–146)          | 98 (83–135)        | 106 (89–133)        | 0.257            |
| Right ventricular ejection fraction, % (IQR)                          | 52 (45–61)             | 55 (47–63)         | 50 (44–60)          | <b>0.022</b>     |
| Right ventricular end-diastolic volume index, mL/m <sup>2</sup> (IQR) | 141 (115–182)          | 130 (112–166)      | 146 (119–187)       | 0.056            |

OAC, oral anticoagulation; ALAT, alanine aminotransferase; ASAT, aspartate aminotransferase; Gamma-GT, gamma-glutamyltransferase; E/e', ratio of early transmitral blood velocity to early diastolic mitral annular velocity; RV, right ventricular. Values are given as median and interquartile range (IQR), or total numbers (n) and percent (%). Bold indicates p < 0.05. \* Estimated glomerular filtration rate <60mL/min/1.73m<sup>2</sup>.

**Table S2.** Cox proportional hazard model of registered patients with regard to all bleeding events.

| Variable                                      | Hazard ratio | 95% Confidence interval | <i>p</i> value   | Adjusted hazard ratio | 95% Confidence interval | <i>p</i> value   |
|-----------------------------------------------|--------------|-------------------------|------------------|-----------------------|-------------------------|------------------|
| <b>Clinical parameters</b>                    |              |                         |                  |                       |                         |                  |
| Systolic blood pressure, mmHg                 | 1.01         | (1.00–1.03)             | 0.101            |                       |                         |                  |
| Diastolic blood pressure, mmHg                | 0.99         | (0.97–1.02)             | 0.54             |                       |                         |                  |
| <b>Antithrombotic therapy with VKA</b>        | 1.44         | (1.03–1.68)             | <b>0.038</b>     | 1.80                  | (1.50–1.92)             | <b>0.001</b>     |
| <b>Antithrombotic therapy with NOAC</b>       | 1.54         | (1.17–1.75)             | <b>0.010</b>     | 7.13                  | (2.60–19.53)            | <b>&lt;0.001</b> |
| <b>Antiplatelet therapy</b>                   | 1.52         | (1.07–1.75)             | <b>0.029</b>     | 1.36                  | (0.69–1.35)             | 0.245            |
| <b>Co-morbidities</b>                         |              |                         |                  |                       |                         |                  |
| CHA <sub>2</sub> DS <sub>2</sub> -VASc score  | 0.95         | (0.79–1.15)             | 0.615            |                       |                         |                  |
| <b>HAS-BLED score</b>                         | 2.12         | (1.66–2.70)             | <b>&lt;0.001</b> | 2.23                  | (1.72–2.89)             | <b>&lt;0.001</b> |
| <b>Invasive hemodynamic parameters</b>        |              |                         |                  |                       |                         |                  |
| Mean pulmonary arterial pressure, mmHg        | 1.00         | (0.98–1.03)             | 0.815            |                       |                         |                  |
| Right atrial pressure, mmHg                   | 1.04         | (0.99–1.09)             | 0.087            |                       |                         |                  |
| Pulmonary artery wedge pressure, mmHg         | 1.05         | (1.00–1.11)             | 0.061            |                       |                         |                  |
| Left ventricular end diastolic pressure, mmHg | 1.05         | (0.99–1.12)             | 0.085            |                       |                         |                  |

NOAC, non-vitamin K oral anticoagulant; VKA, vitamin K antagonist; CHA<sub>2</sub>DS<sub>2</sub>-VASc (Congestive heart failure, Hypertension, Age ≥75 years, Diabetes mellitus, prior Stroke, Vascular disease, Age 65-74 years, Sex category) Score calculates stroke risk for patients with atrial fibrillation; HAS-BLED (Hypertension, Abnormal Renal/Liver Function, Stroke, Bleeding History or Predisposition, Labile INR, Elderly, Drugs/Alcohol Concomitantly) Score estimates risk for major bleeding; ALAT, alanine aminotransferase; ASAT, aspartate aminotransferase; Gamma-GT, gamma-glutamyltransferase; E/e', ratio of early transmitral blood velocity to early diastolic mitral annular velocity; RV, right ventricular Bold indicates *p*<0.05.

**Table 3.** Baseline characteristics of orally anticoagulated patients with regard to gastrointestinal bleeding.

| Variable N (%)                                             | All patients on OAC (n=212) | No GI bleeding (n=194) | GI bleeding (n=18)     | p value          |
|------------------------------------------------------------|-----------------------------|------------------------|------------------------|------------------|
| <b>Clinical parameters</b>                                 |                             |                        |                        |                  |
| Age, years (IQR)                                           | 72 (68–77)                  | 72 (68–11)             | 69 (64–75)             | 0.326            |
| Female gender, n (%)                                       | 144 (67.9)                  | 134 (69.1)             | 10 (55.6)              | 0.240            |
| <b>Body mass index, kg/m<sup>2</sup> (IQR)</b>             | 30.0 (26.1–33.9)            | 29.6 (26.0–32.4)       | 34.1 (33.6–34.9)       | <b>0.018</b>     |
| <b>6-minute walk distance, m (IQR)</b>                     | 310 (227–390)               | 317 (247–400)          | 243 (100–329)          | <b>0.032</b>     |
| Systolic blood pressure, mmHg (IQR)                        | 138 (122–150)               | 138 (123–150)          | 138 (114–160)          | 0.794            |
| Diastolic blood pressure, mmHg (IQR)                       | 79 (70–85)                  | 79 (70–86)             | 74 (61–85)             | 0.930            |
| NYHA functional class ≥ III, n (%)                         | 129 (62.9)                  | 117 (61.9)             | 12 (75.0)              | 0.425            |
| NT-proBNP, pg/mL (IQR)                                     | 1389 (700–2286)             | 1066 (420–1979)        | 1348 (456–2695)        | 0.789            |
| <b>Antiplatelet therapy, n (%)</b>                         | 29 (14.0)                   | 167 (87.4)             | 11 (68.8)              | <b>0.039</b>     |
| <b>Co-morbidities</b>                                      |                             |                        |                        |                  |
| <b>Atrial fibrillation, n (%)</b>                          | 179 (84.4)                  | 167 (86.1)             | 12 (66.7)              | <b>0.030</b>     |
| CHA <sub>2</sub> DS <sub>2</sub> -VASc score, median (IQR) | 5.00 (4.00–6.00)            | 5.00 (4.00–6.00)       | 4.50 (4.00–6.25)       | 0.289            |
| <b>HAS-BLED score, median (IQR)</b>                        | 3.00 (2.00–4.00)            | 3.00 (2.00–4.00)       | 4.00 (3.00–5.00)       | <b>&lt;0.001</b> |
| Arterial hypertension, n (%)                               | 202 (95.7)                  | 184 (95.3)             | 18 (100)               | 0.349            |
| <b>Chronic kidney disease*, n (%)</b>                      | 106 (51.2)                  | 92 (48.7)              | 14 (77.8)              | <b>0.018</b>     |
| Diabetes mellitus, n (%)                                   | 74 (35.4)                   | 69 (36.1)              | 5 (27.8)               | 0.479            |
| Anemia, n (%)                                              | 124 (59.9)                  | 111 (58.1)             | 13 (81.3)              | 0.070            |
| <b>Laboratory parameters</b>                               |                             |                        |                        |                  |
| Platelet count, G/L (IQR)                                  | 233.21 (81.00–266.00)       | 130.02 (81.00–267.00)  | 267.61 (182.00–246.00) | 0.773            |
| Albumin, g/L (IQR)                                         | 41.16 (38.70–43.20)         | 41.04 (38.70–43.20)    | 42.38 (38.30–43.40)    | 0.754            |
| Cholinesterase, kU/L (IQR)                                 | 6.24 (5.12–7.43)            | 6.48 (5.16–7.53)       | 5.57 (4.44–6.35)       | 0.624            |
| ALAT, U/L (IQR)                                            | 25.69 (16.00–31.00)         | 26.06 (17.00–31.00)    | 21.72 (14.00–27.00)    | 0.085            |
| ASAT, U/L (IQR)                                            | 27.85 (21.00–33.00)         | 27.84 (21.00–33.00)    | 28.00 (23.00–31.00)    | 0.838            |
| Gamma-GT, U/L (IQR)                                        | 76.16 (26.00–78.50)         | 75.50 (26.00–80.00)    | 83.22 (28.00–75.00)    | 0.411            |
| Serum Creatinine, mg/dL (IQR)                              | 1.23 (0.91–1.35)            | 1.19 (0.90–1.33)       | 1.73 (1.02–1.70)       | 0.203            |
| <b>Echocardiographic parameters</b>                        |                             |                        |                        |                  |
| E/e', ratio (IQR)                                          | 15.5 (11.0–18.3)            | 15.5 (11.0–20.0)       | 16.0 (15.0–18.3)       | 0.705            |
| Left atrial diameter, mm (IQR)                             | 64 (60–68)                  | 64 (60–68)             | 62 (56–69)             | 0.491            |
| Right atrial diameter, mm (IQR)                            | 64 (58–70)                  | 64 (58–70)             | 65 (58–71)             | 0.992            |
| RV-performance moderately to severely reduced n (%)        | 35 (16.5)                   | 30 (15.5)              | 5 (27.8)               | 0.178            |
| Systolic pulmonary arterial pressure, mmHg (IQR)           | 61 (48–74)                  | 61 (48–72)             | 67 (54–75)             | 0.070            |
| <b>Significant tricuspid regurgitation**, n (%)</b>        | 15 (7.7)                    | 11 (6.3)               | 4 (22.2)               | <b>0.016</b>     |

| <b>Cardiac magnetic resonance imaging parameters</b>                  |                        |                        |                        |                  |
|-----------------------------------------------------------------------|------------------------|------------------------|------------------------|------------------|
| Left atrial area index, mm/m <sup>2</sup> (IQR)                       | 34 (27–37)             | 34 (27–37)             | 32 (27–36)             | 0.732            |
| Right atrial area index, mm/m <sup>2</sup> (IQR)                      | 32 (25–36)             | 32 (25–36)             | 29 (24–35)             | 0.930            |
| Left ventricular ejection fraction, %                                 | 62 (53–71)             | 62 (53–71)             | 65 (57–76)             | 0.664            |
| Left ventricular end-diastolic volume index, mL/m <sup>2</sup> (IQR)  | 128 (100–147)          | 126 (99–142)           | 157 (114–197)          | 0.698            |
| Left ventricular mass index, g/m <sup>2</sup> (IQR)                   | 111 (89–133)           | 11 (89–133)            | 118 (92–151)           | 0.374            |
| Right ventricular ejection fraction, %                                | 51 (44–60)             | 51 (44–60)             | 54 (43–63)             | 0.664            |
| Right ventricular end-diastolic volume index, mL/m <sup>2</sup> (IQR) | 165 (117–187)          | 164 (117–186)          | 187 (124–195)          | 0.732            |
| <b>Invasive hemodynamic parameters</b>                                |                        |                        |                        |                  |
| <b>Mean pulmonary arterial pressure, mmHg (IQR)</b>                   | 35 (28–39)             | 34 (27–38)             | 41 (34–48)             | <b>0.040</b>     |
| <b>Right atrial pressure, mmHg (IQR)</b>                              | 12 (8–16)              | 12 (7–15)              | 19 (16–21)             | <b>&lt;0.001</b> |
| <b>Pulmonary artery wedge pressure, mmHg (IQR)</b>                    | 20 (17–24)             | 19 (16–23)             | 26 (22–31)             | <b>0.005</b>     |
| Left ventricular end diastolic pressure, mmHg (IQR)                   | 19 (16–23)             | 19 (15–22)             | 23 (19–28)             | 0.119            |
| Stroke volume index, mL/m <sup>2</sup> (IQR)                          | 38.99 (30.83–46.12)    | 38.51 (30.80–45.48)    | 43.37 (34.27– 47.62)   | 1.000            |
| Cardiac index, L/min/m <sup>2</sup> (IQR)                             | 2.70 (2.20–3.00)       | 2.68 (2.18–2.97)       | 2.88 (2.54–3.43)       | 0.587            |
| Pulmonary vascular resistance, dyn·s·cm <sup>-5</sup> (IQR)           | 235.14 (140.63–290.91) | 231.22 (141.23–286.91) | 271.67 (126.32–425.53) | 0.979            |

OAC, oral anticoagulation; NYHA, New York Heart Association; NT-proBNP, N-terminal prohormone of brain natriuretic peptide; NOAC, non-vitamin K oral anticoagulant; VKA, vitamin K antagonist; CHA<sub>2</sub>DS<sub>2</sub>-VASc (Congestive heart failure, Hypertension, Age ≥75 years, Diabetes mellitus, prior Stroke, Vascular disease, Age 65-74 years, Sex category) Score calculates stroke risk for patients with atrial fibrillation; HAS-BLED (Hypertension, Abnormal Renal/Liver Function, Stroke, Bleeding History or Predisposition, Labile INR, Elderly, Drugs/Alcohol Concomitantly) Score estimates risk for major bleeding; ALAT, alanine aminotransferase; ASAT, aspartate aminotransferase; Gamma-GT, gamma-glutamyltransferase; E/e', ratio of early transmitral blood velocity to early diastolic mitral annular velocity; RV, right ventricular. Values are given as median and interquartile range (IQR), or total numbers (n) and percent (%). Bold indicates p<0.05. \* Estimated glomerular filtration rate <60mL/min/1.73m<sup>2</sup>.
